# Supplementary material for: Identification of chemokine receptors as potential modulators of endocrine resistance in oestrogen receptor–positive breast cancers
Source: PubMed Central journal article supplement (PMC4303127; doi:10.1186/s13058-014-0447-1), 2014-10-31

**wt-MCF7**

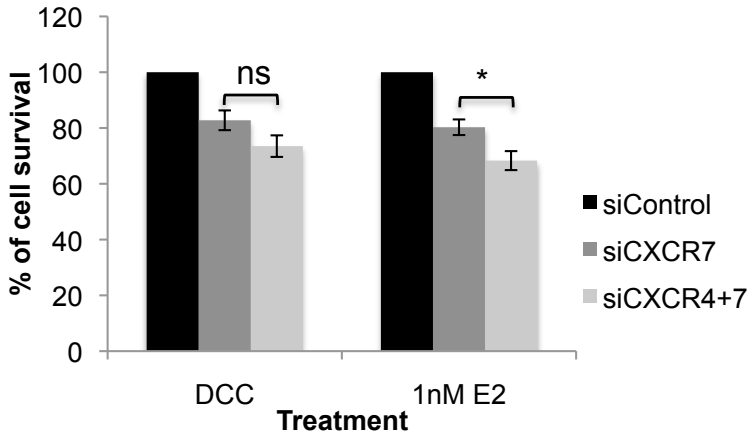

**MCF7-LTED**

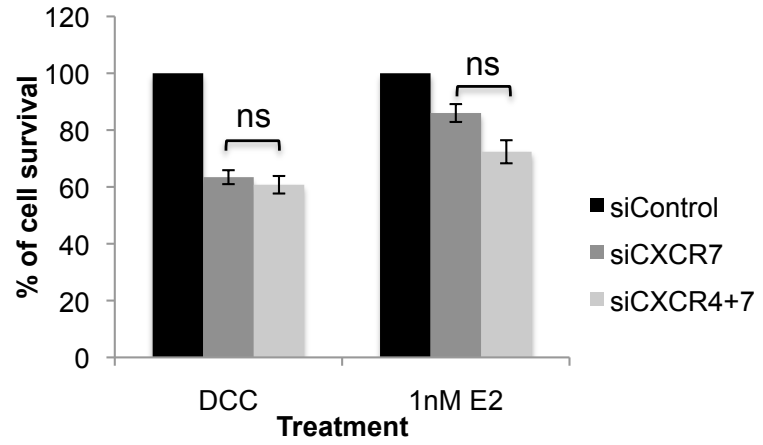

**wt-SUM44**

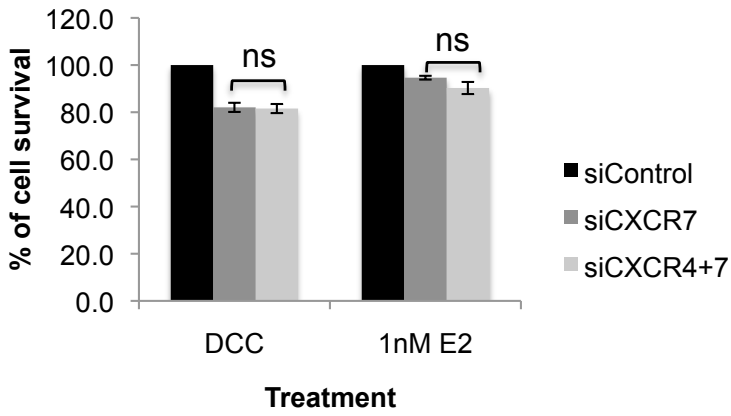

**SUM44-LTED**

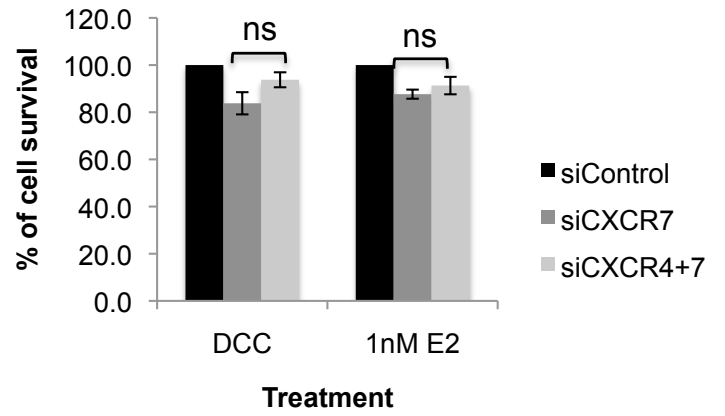

Supplement: 13058_2014_447_MOESM3_ESM.pdf [file 13058_2014_447_MOESM3_ESM.pdf]
