# Supplementary material for: Identification of chemokine receptors as potential modulators of endocrine resistance in oestrogen receptor–positive breast cancers
Source: PubMed Central journal article supplement (PMC4303127; doi:10.1186/s13058-014-0447-1), 2014-10-31

A

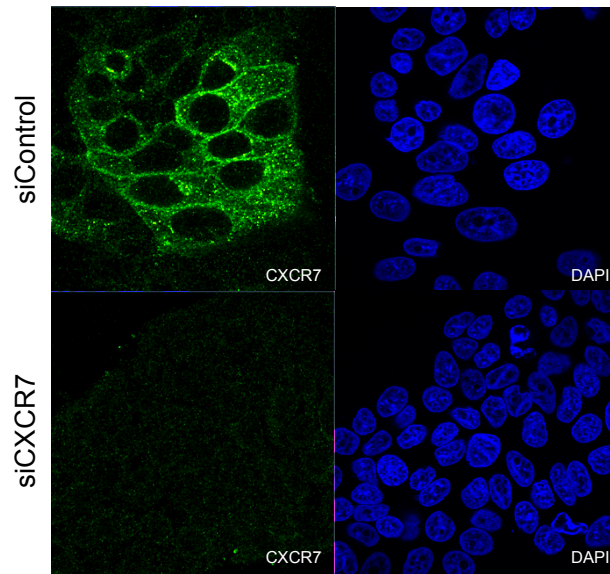

B

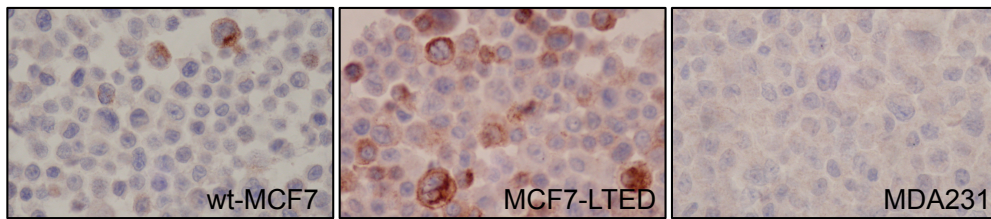

C

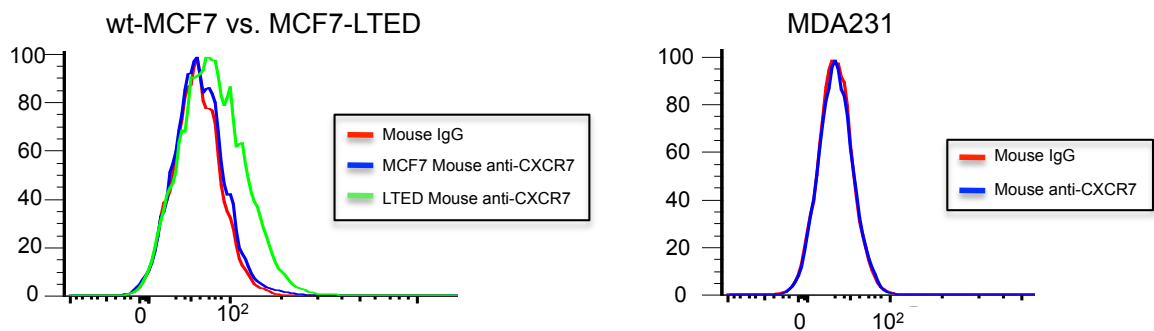

Supplement: 13058_2014_447_MOESM6_ESM.pdf [file 13058_2014_447_MOESM6_ESM.pdf]
